# Supplementary material
Source: PubMed Central journal article supplement (PMC4204765)

**Supplementary Figure.** Plots of the  $-\log_{10}(\text{p-values})$  for meta-analyzed SNP markers within and surrounding the top ranking genes A) *DMRT1*, B) *MAP3K1*, C) *ZFPM2*, D) *GATA4* and E) *IGF1R* belonging to the sex determination gene set. Dark blue dots represent meta-analyzed SNP markers. Individual results for each scan are shown for the most statistically significant markers in the region; a magenta diamond for the Penn scan, a yellow triangle for the UK scan, and a light blue square for the NCI scan.

A

Meta SNPs || || || ||

|| || || ||

|| || || || || || || ||

|| || || ||

|| || || || ||

|| || || || || || || ||

|| || || ||

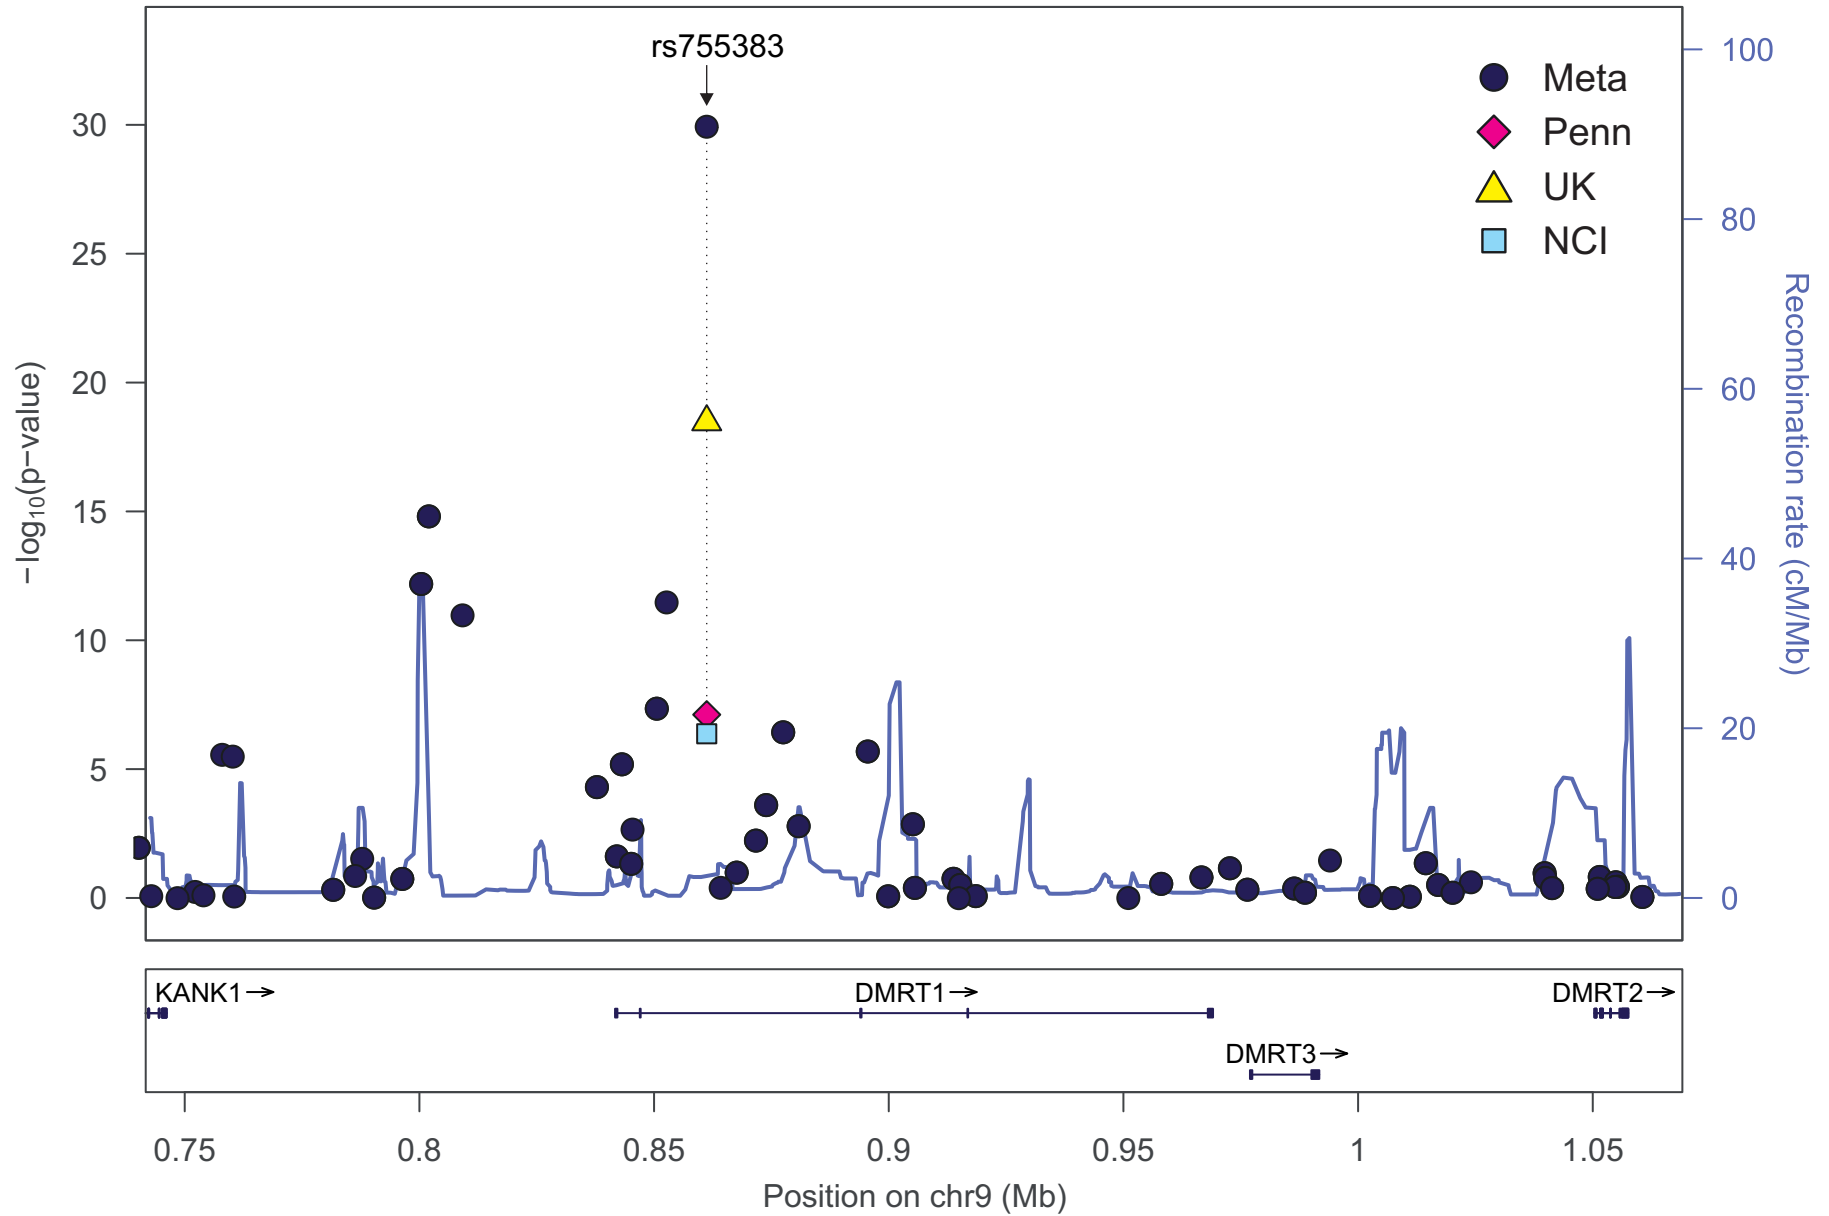





D

Meta SNPs

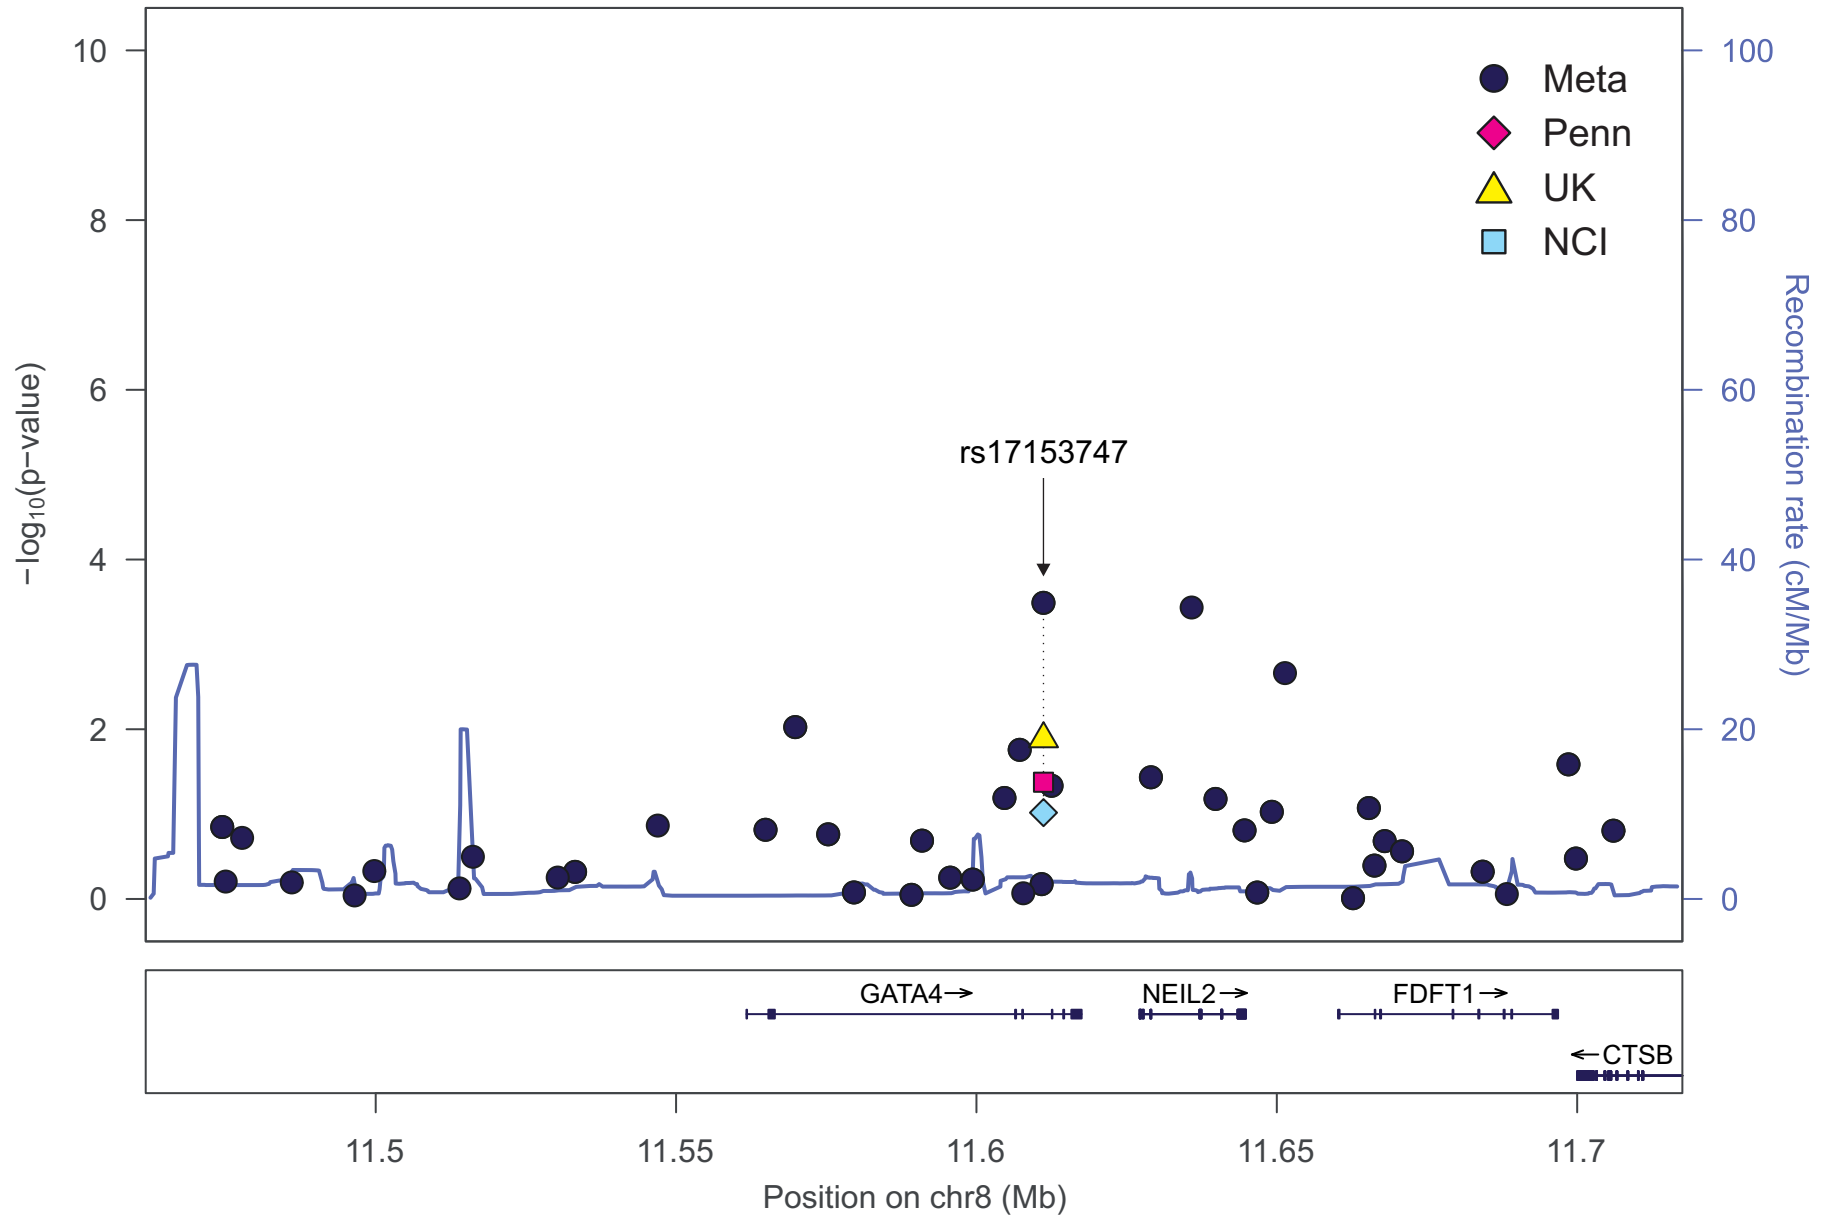

Meta SNPs

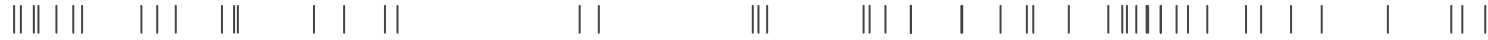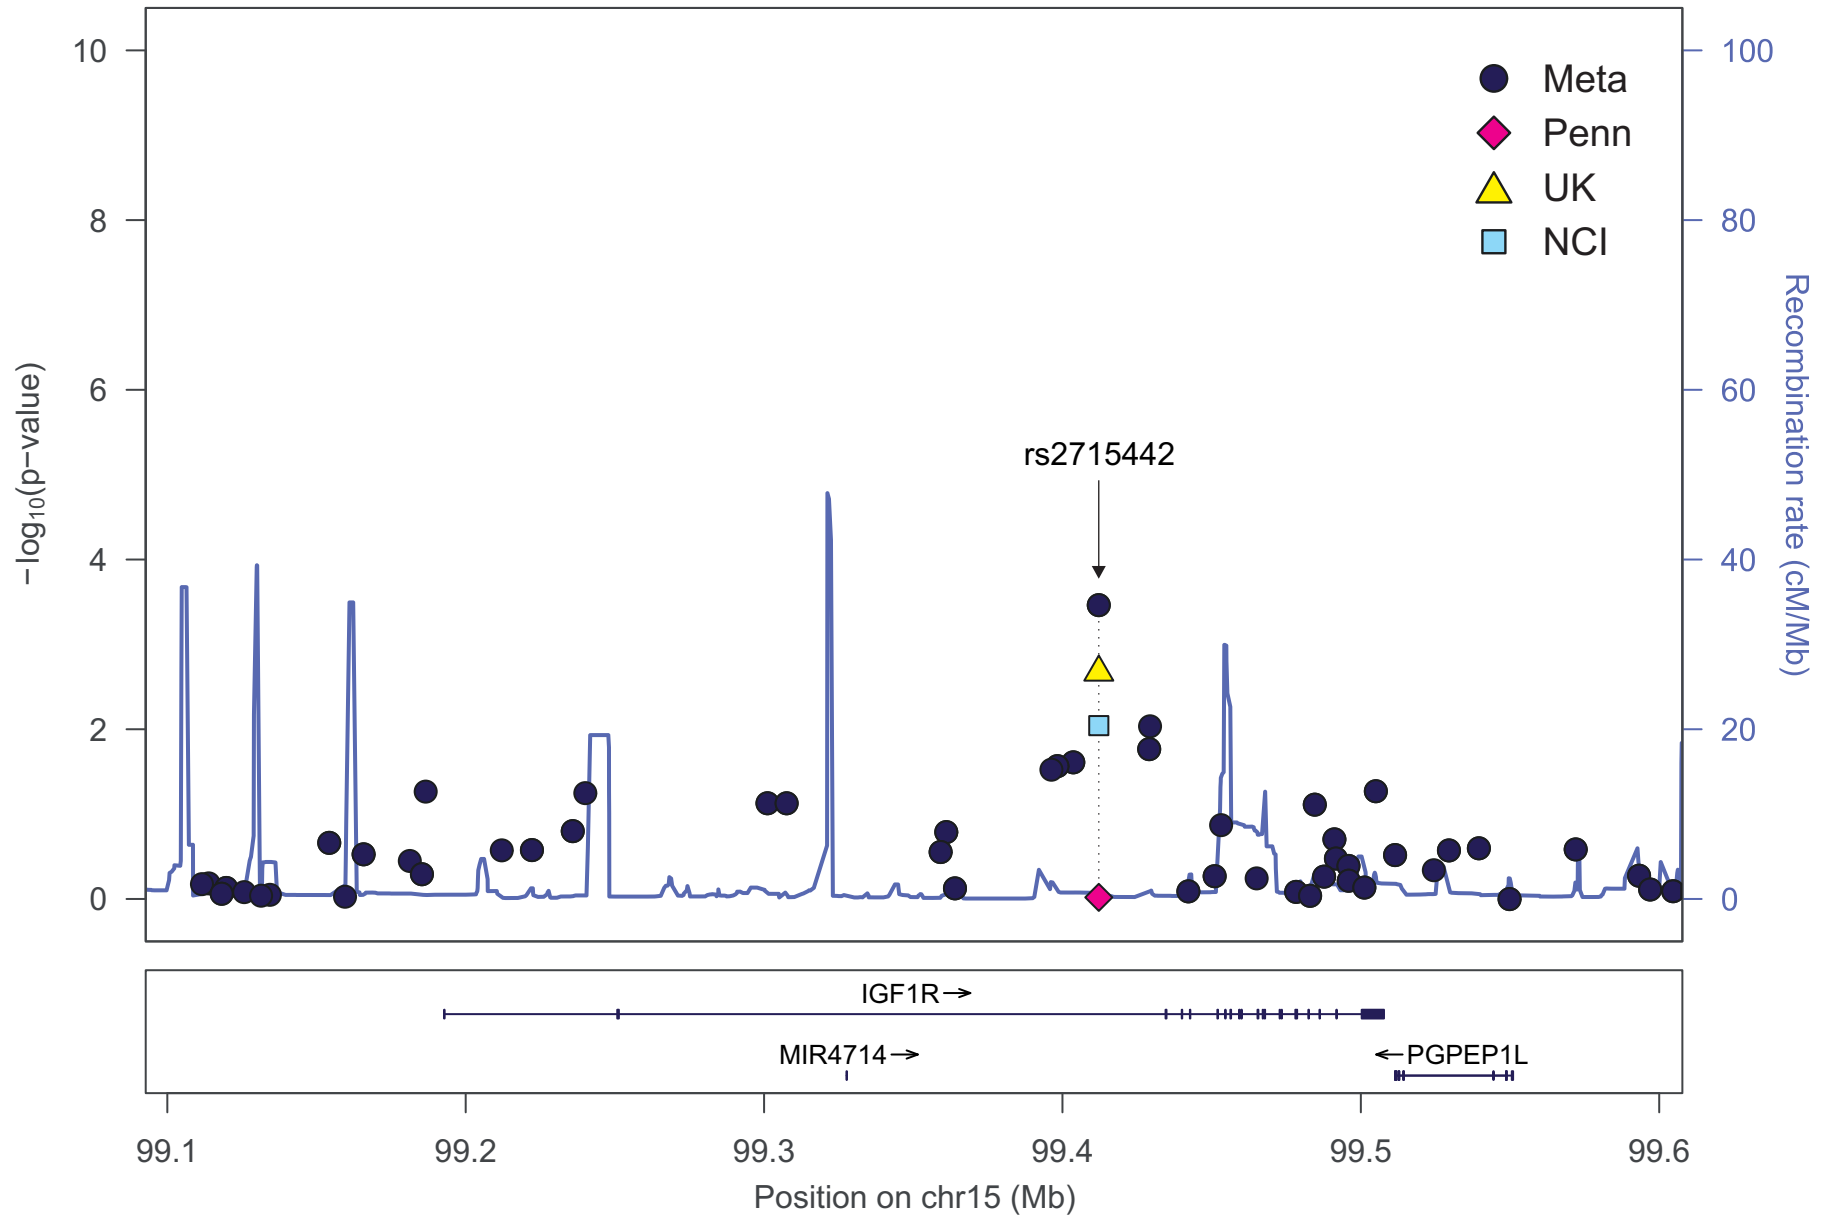

Supplement: supp_ddu305_ddu305supp.pdf [file supp_ddu305_ddu305supp.pdf]
